# Supplementary material
Source: PubMed Central journal article supplement (PMC5709115)
Supplement: 2017_171736-Disclosures_and_Contributions.pdf [file 2017_171736-Disclosures_and_Contributions.pdf]

Haematologica  
HAEMATOL/2017/171736  
Version 3

Rac1 functions downstream of miR-142 in regulation of erythropoiesis

Natali Rivkin, Elik Chapnik, Yehudit Birger, Eran Yanowski, Caterina Curato, Alexander Mildner, Ziv Porat, Gail Amir, Shai Izraeli, Steffen Jung, and Eran Hornstein

Disclosures: The work is funded by the Minerva foundation and Minna-James-Heineman Stiftung through Minerva. Work at the Hornstein lab is further funded by an ERC consolidator program, Israel Science Foundation, the Legacy-heritage program, Bruno and Ilse Frick Foundation for Research on ALS, the ALSTherapy Alliance, The Motor Neurone Disease Association (UK), the Thierry Latran Foundation for ALS research, the ERA-Net for Research Programmes on Rare Diseases

Contributions: Natalia Rivkin: Conceived and led the project, contributed substantially to research conception and design. N.R. developed the interpretations presented and wrote the manuscript with E.H. and provided approval of the version to be published. Elik Chapnik: Contributed substantially to research conception and design, experimentations and data analysis including establishing the miR-142 loss of function allele and provided approval of the version to be published. Yehudit Birger: established BFUe / CFUe colonies and liquid culture and provided approval of the version to be published. Eran Yanowski: Performed Next generation sequencing and analysis and provided approval of the version to be published. Caterina Curato: Experimentations and data analysis and provided approval of the version to be published. Alexander Mildner: Experimentations and data analysis and provided approval of the version to be published. Ziv Porat: Performed ImageStream flow cytometry including acquisition of data, analysis of data critical for drafting the article and provided approval of the version to be published. Gail Amir: Performed histological analysis and provided approval of the version to be published. Shai Izraeli: Provided resources, critical scientific interpretations of data and provided approval of the version to be published. Steffen Jung: Provided resources, scientific interpretations of data, important intellectual content and provided approval of the version to be published. Eran Hornstein: Conceived and supervised the study, developed the interpretations presented, wrote the manuscript and approved the version to be published. &#8195;
